# Supplementary material
Source: Springer Nature journal article supplement (https://www.springermedizin.de/resource/supplementary/13046_2012_562_MOESM12_ESM.pdf/9662454)

# 52 NSCLC patients

ERCC1+BAG-1

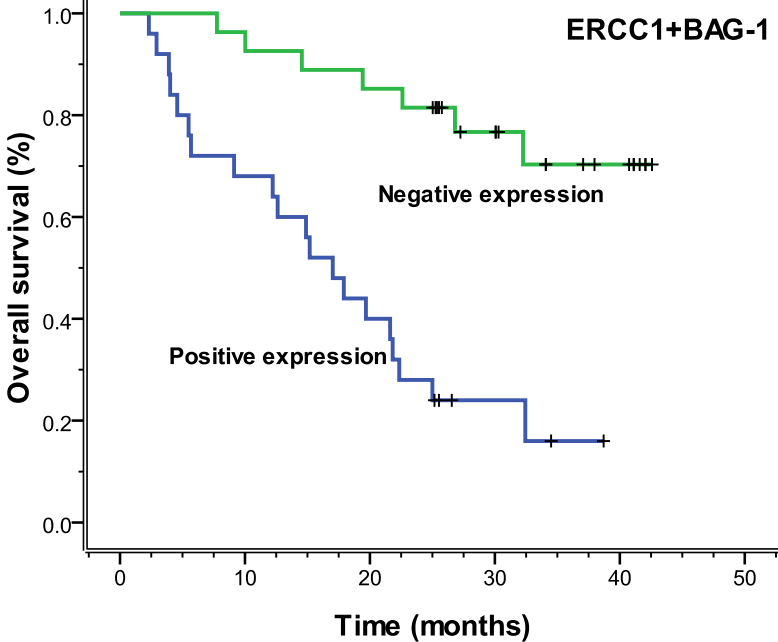

Supplement: MOESM12 [file 9662454]
